# Supplementary material
Source: MDPI journal article supplement (https://www.mdpi.com/1424-8247/12/2/50)
Supplement: s1 [file s1]

**Table S2. Data from 102 patients included in survival analysis from The Human Protein Atlas**

|                       | Age in years<br>Mean (range) | n (%)     | Stage   | n (%)     | Primary Tumor<br>Location |
|-----------------------|------------------------------|-----------|---------|-----------|---------------------------|
| Data Missing (n = 29) |                              |           |         |           |                           |
| Male (n = 43)         | 60.7 (24-90)                 | 0         | I       | 6 (14.0)  | Head and neck             |
|                       |                              | 22 (51.2) | II      | 12 (27.9) | Extremities               |
|                       |                              | 13 (30.2) | III     | 21 (48.8) | Trunk                     |
|                       |                              | 2 (4.6)   | IV      | 4 (9.3)   | Other/unknown             |
|                       |                              | 6 (14.0)  | unknown |           |                           |
| Female (n = 30)       | 65.7 (41-84)                 | 1 (3.3)   | I       | 2 (6.7)   | Head and neck             |
|                       |                              | 15(50.0)  | II      | 17 (56.7) | Extremities               |
|                       |                              | 10 (33.3) | III     | 11 (36.6) | Trunk                     |
|                       |                              | 1 (3.3)   | IV      | 0         | Other/unknown             |
|                       |                              | 3 (10.0)  | unknown |           |                           |

Race: 3 male and 1 female were Asian. All other patients for whom we have data were White.
