# Supplementary material
Source: MDPI journal article supplement (https://www.mdpi.com/1424-8247/12/2/50)
Supplement: s1 [file s1]

**Table S1. Significantly differentially expressed genes identified in A375 cells using the PanCancer Pathways panel**

| <b>Gene</b> | <b>log Fold Change (base 2)</b> | <b>likelihood ratio</b> | <b>p-value</b> | <b>q-value</b> | <b>gene description</b>                               |
|-------------|---------------------------------|-------------------------|----------------|----------------|-------------------------------------------------------|
| DLL4        | 34.24633383                     | 10.95023505             | 9.36E-04       | 0.00814799     | delta like canonical Notch ligand 4                   |
| RASGRP1     | 3.849823722                     | 7.758752157             | 0.00534529     | 0.0332396      | RAS guanyl releasing protein 1                        |
| FGF7        | 2.756868365                     | 30.59894772             | 3.17E-08       | 1.17E-06       | fibroblast growth factor 7                            |
| NR4A3       | 2.10117785                      | 15.69648452             | 7.44E-05       | 9.65E-04       | nuclear receptor subfamily 4 group A member 3         |
| DUSP10      | 1.38589944                      | 48.34190796             | 3.58E-12       | 5.30E-10       | dual specificity phosphatase 10                       |
| MAP3K13     | 1.356829915                     | 15.73905645             | 7.27E-05       | 9.61E-04       | mitogen-activated protein kinase kinase kinase 13     |
| BMPR1B      | 1.165341688                     | 7.735556045             | 0.00541439     | 0.03338873     | bone morphogenetic protein receptor type 1B           |
| IL24        | 1.150733409                     | 12.49121538             | 4.09E-04       | 0.00403419     | interleukin 24                                        |
| GHR         | 1.065135437                     | 14.89092593             | 1.14E-04       | 0.00138185     | growth hormone receptor                               |
| SOCS2       | 1.039055915                     | 13.91198558             | 1.92E-04       | 0.00205455     | suppressor of cytokine signaling 2                    |
| RXRG        | 1.030917173                     | 11.04686809             | 8.88E-04       | 0.00783298     | retinoid X receptor gamma                             |
| ITGB8       | 0.991245707                     | 36.02443157             | 1.95E-09       | 8.48E-08       | integrin subunit beta 8                               |
| FOS         | 0.826687914                     | 19.46308036             | 1.03E-05       | 1.85E-04       | Fos proto-oncogene, AP-1 transcription factor subunit |
| MYC         | 0.789560539                     | 14.74447121             | 1.23E-04       | 0.00144603     | MYC proto-oncogene, bHLH transcription factor         |
| WEE1        | 0.762398124                     | 22.1276268              | 2.55E-06       | 5.39E-05       | WEE1 G2 checkpoint kinase                             |
| INHBA       | 0.720047146                     | 13.94113134             | 1.89E-04       | 0.00205269     | inhibin beta A subunit                                |
| CDK2        | 0.647563304                     | 19.80569938             | 8.57E-06       | 1.63E-04       | cyclin dependent kinase 2                             |
| NFKBIZ      | 0.644424945                     | 6.860935426             | 0.00881004     | 0.04938963     | NFKB inhibitor zeta                                   |
| NOTCH2      | 0.634515107                     | 12.66625051             | 3.72E-04       | 0.00372315     | notch 2                                               |
| IL6R        | 0.609554537                     | 9.556363046             | 0.00199257     | 0.01445594     | interleukin 6 receptor                                |
| FBXW7       | 0.59605282                      | 8.804317878             | 0.00300518     | 0.02040217     | F-box and WD repeat domain containing 7               |
| IL1RAP      | 0.566197855                     | 10.18791189             | 0.00141364     | 0.01124834     | interleukin 1 receptor accessory protein              |
| CTNNB1      | 0.560456986                     | 12.31465908             | 4.49E-04       | 0.00431905     | catenin beta 1                                        |
| PDGFD       | 0.520849617                     | 9.634166591             | 0.00190991     | 0.01403768     | platelet derived growth factor D                      |
| PCNA        | -0.55050283                     | 7.414664734             | 0.00646944     | 0.03860793     | proliferating cell nuclear antigen                    |
| MAP2K1      | -0.56841631                     | 17.11296453             | 3.52E-05       | 5.32E-04       | mitogen-activated protein kinase kinase 1             |
| MDC1        | -0.57003873                     | 14.38256345             | 1.49E-04       | 0.00169833     | mediator of DNA damage checkpoint 1                   |
| MAPK1       | -0.57141159                     | 22.45482379             | 2.15E-06       | 4.68E-05       | mitogen-activated protein kinase 1                    |
| RFC3        | -0.57807524                     | 18.17711238             | 2.01E-05       | 3.24E-04       | replication factor C subunit 3                        |

| <b>Gene</b> | <b>log Fold Change (base 2)</b> | <b>likelihood ratio</b> | <b>p-value</b> | <b>q-value</b> | <b>gene description</b>                                  |
|-------------|---------------------------------|-------------------------|----------------|----------------|----------------------------------------------------------|
| MSH6        | -0.5894768                      | 23.40937061             | 1.31E-06       | 3.23E-05       | mutS homolog 6                                           |
| FANCA       | -0.59550683                     | 7.988122421             | 0.00470852     | 0.03056409     | Fanconi anemia complementation group A                   |
| CCNE2       | -0.60124371                     | 15.29965503             | 9.17E-05       | 0.00115055     | cyclin E2                                                |
| UBE2T       | -0.6087933                      | 22.69099517             | 1.90E-06       | 4.27E-05       | ubiquitin conjugating enzyme E2 T                        |
| TTK         | -0.61180397                     | 19.15140981             | 1.21E-05       | 2.13E-04       | TTK protein kinase                                       |
| CDC25B      | -0.61361832                     | 25.34162618             | 4.80E-07       | 1.37E-05       | cell division cycle 25B                                  |
| PPARG       | -0.61769858                     | 24.26217                | 8.41E-07       | 2.22E-05       | peroxisome proliferator activated receptor gamma         |
| TIAM1       | -0.6178792                      | 8.89190518              | 0.00286438     | 0.01962629     | T-cell lymphoma invasion and metastasis 1                |
| FANCC       | -0.61842668                     | 10.85014665             | 9.88E-04       | 0.00850036     | Fanconi anemia complementation group C                   |
| BRIP1       | -0.62908169                     | 16.76201189             | 4.24E-05       | 6.05E-04       | BRCA1 interacting protein C-terminal helicase 1          |
| MAP2K6      | -0.64321301                     | 16.23148333             | 5.61E-05       | 7.68E-04       | mitogen-activated protein kinase kinase 6                |
| CDC7        | -0.65031292                     | 14.49905056             | 1.40E-04       | 0.00162141     | cell division cycle 7                                    |
| CHEK1       | -0.65771479                     | 28.6264528              | 8.78E-08       | 2.95E-06       | checkpoint kinase 1                                      |
| PKMYT1      | -0.66257577                     | 7.577652666             | 0.00590963     | 0.0355539      | protein kinase, membrane associated tyrosine/threonine 1 |
| BAD         | -0.67145767                     | 14.79547137             | 1.20E-04       | 0.00143014     | BCL2 associated agonist of cell death                    |
| MSH2        | -0.67961208                     | 31.35289475             | 2.15E-08       | 8.38E-07       | mutS homolog 2                                           |
| XRCC4       | -0.68250984                     | 20.78169099             | 5.15E-06       | 1.05E-04       | X-ray repair cross complementing 4                       |
| FGFR1       | -0.68751608                     | 9.628362224             | 0.00191595     | 0.01403768     | fibroblast growth factor receptor 1                      |
| VEGFC       | -0.69897605                     | 9.460364469             | 0.00209959     | 0.01508446     | vascular endothelial growth factor C                     |
| BRCA2       | -0.70382538                     | 19.62777418             | 9.41E-06       | 1.74E-04       | BRCA2, DNA repair associated                             |
| HELLS       | -0.70873208                     | 18.83318926             | 1.43E-05       | 2.46E-04       | helicase, lymphoid specific                              |
| EPHA2       | -0.70961324                     | 18.66647243             | 1.56E-05       | 2.62E-04       | EPH receptor A2                                          |
| CDKN2C      | -0.72609421                     | 24.33047773             | 8.11E-07       | 2.22E-05       | cyclin dependent kinase inhibitor 2C                     |
| SETBP1      | -0.73914232                     | 9.313583175             | 0.00227461     | 0.0160306      | SET binding protein 1                                    |
| MCM7        | -0.74123211                     | 36.64959364             | 1.41E-09       | 6.98E-08       | minichromosome maintenance complex component 7           |
| FANCB       | -0.75048102                     | 18.50789381             | 1.69E-05       | 2.78E-04       | Fanconi anemia complementation group B                   |
| WHSC1       | -0.76549798                     | 16.97802475             | 3.78E-05       | 5.60E-04       | NA                                                       |
| SMAD3       | -0.76990233                     | 17.18314506             | 3.39E-05       | 5.23E-04       | SMAD family member 3                                     |
| POLE2       | -0.77672428                     | 13.07297075             | 3.00E-04       | 0.00312246     | DNA polymerase epsilon 2, accessory subunit              |
| CDK11A      | -0.78511625                     | 17.68958239             | 2.60E-05       | 4.09E-04       | cyclin dependent kinase 11A                              |

| Gene     | log Fold Change (base 2) | likelihood ratio | p-value    | q-value    | gene description                               |
|----------|--------------------------|------------------|------------|------------|------------------------------------------------|
| IGFBP3   | -0.80064979              | 7.362621         | 0.00665936 | 0.03942344 | insulin like growth factor binding protein 3   |
| PRKCA    | -0.80083789              | 16.71925551      | 4.33E-05   | 6.05E-04   | protein kinase C alpha                         |
| ITGA3    | -0.828689                | 14.08578633      | 1.75E-04   | 0.00195829 | integrin subunit alpha 3                       |
| CCND1    | -0.84027787              | 23.11364013      | 1.53E-06   | 3.65E-05   | cyclin D1                                      |
| MAD2L2   | -0.85747819              | 42.64049496      | 6.58E-11   | 4.12E-09   | mitotic arrest deficient 2 like 2              |
| IL8      | -0.87365117              | 36.37423469      | 1.63E-09   | 7.53E-08   | NA                                             |
| FGFR3    | -0.88130128              | 7.092751072      | 0.00773963 | 0.04439791 | fibroblast growth factor receptor 3            |
| LIF      | -0.8934768               | 12.7301624       | 3.60E-04   | 0.00364734 | LIF, interleukin 6 family cytokine             |
| FANCG    | -0.89387                 | 26.08404278      | 3.27E-07   | 9.68E-06   | Fanconi anemia complementation group G         |
| HIST1H3H | -0.90327207              | 27.65258629      | 1.45E-07   | 4.52E-06   | histone cluster 1 H3 family member h           |
| CCNA2    | -0.90692624              | 45.1542801       | 1.82E-11   | 1.35E-09   | cyclin A2                                      |
| RFC4     | -0.90890672              | 23.94897712      | 9.89E-07   | 2.52E-05   | replication factor C subunit 4                 |
| STMN1    | -0.92292817              | 51.66328666      | 6.59E-13   | 2.44E-10   | stathmin 1                                     |
| MCM2     | -0.92552278              | 15.9687372       | 6.44E-05   | 8.66E-04   | minichromosome maintenance complex component 2 |
| ETV4     | -0.94645047              | 27.6323298       | 1.47E-07   | 4.52E-06   | ETS variant 4                                  |
| CCNB1    | -0.95061856              | 28.87650682      | 7.71E-08   | 2.72E-06   | cyclin B1                                      |
| BRCA1    | -0.97696923              | 48.82105216      | 2.80E-12   | 5.19E-10   | BRCA1, DNA repair associated                   |
| C19orf40 | -0.98283476              | 34.57268323      | 4.11E-09   | 1.69E-07   | NA                                             |
| GNAQ     | -0.98578856              | 42.6085488       | 6.69E-11   | 4.12E-09   | G protein subunit alpha q                      |
| HIST1H3B | -1.00673311              | 45.80180177      | 1.31E-11   | 1.35E-09   | histone cluster 1 H3 family member b           |
| MCM5     | -1.03326006              | 20.74087765      | 5.26E-06   | 1.05E-04   | minichromosome maintenance complex component 5 |
| HIST1H3G | -1.07545582              | 22.85902616      | 1.74E-06   | 4.03E-05   | histone cluster 1 H3 family member g           |
| WNT5A    | -1.13054321              | 42.30044402      | 7.83E-11   | 4.46E-09   | Wnt family member 5A                           |
| FN1      | -1.13297179              | 45.41178742      | 1.60E-11   | 1.35E-09   | fibronectin 1                                  |
| HSPA1A   | -1.14438845              | 10.65088406      | 0.00110018 | 0.00914759 | heat shock protein family A (Hsp70) member 1A  |
| E2F1     | -1.18035789              | 38.13075081      | 6.62E-10   | 3.50E-08   | E2F transcription factor 1                     |
| DDB2     | -1.25067164              | 48.9368901       | 2.64E-12   | 5.19E-10   | damage specific DNA binding protein 2          |
| BCL2L1   | -1.27793873              | 45.26361911      | 1.72E-11   | 1.35E-09   | BCL2 like 1                                    |
| PIM1     | -1.3619312               | 10.12740911      | 0.00146081 | 0.01143576 | Pim-1 proto-oncogene, serine/threonine kinase  |
| MGMT     | -1.49249033              | 81.41095568      | 0          | 0          | O-6-methylguanine-DNA methyltransferase        |

| <b>Gene</b> | <b>log Fold Change (base 2)</b> | <b>likelihood ratio</b> | <b>p-value</b> | <b>q-value</b> | <b>gene description</b>                                      |
|-------------|---------------------------------|-------------------------|----------------|----------------|--------------------------------------------------------------|
| RASAL1      | -1.59998716                     | 7.858121127             | 0.00505929     | 0.03172778     | RAS protein activator like 1                                 |
| IRS1        | -2.1241589                      | 45.88028847             | 1.26E-11       | 1.35E-09       | insulin receptor substrate 1                                 |
| CDK11B      | -2.35297023                     | 13.99755866             | 1.83E-04       | 0.00202173     | cyclin dependent kinase 11B                                  |
| BMP4        | -2.36333979                     | 16.72101306             | 4.33E-05       | 6.05E-04       | bone morphogenetic protein 4                                 |
| SFN         | -2.3959464                      | 8.921733875             | 0.00281797     | 0.01948875     | stratifin                                                    |
| LFNG        | -2.49561756                     | 15.22695516             | 9.53E-05       | 0.00117577     | LFNG O-fucosylpeptide 3-beta-N-acetylglucosaminyltransferase |
| PLA2G3      | -3.68836457                     | 10.11822322             | 0.0014681      | 0.01143576     | phospholipase A2 group III                                   |
| ITGB4       | -4.09165151                     | 19.99024789             | 7.78E-06       | 1.52E-04       | integrin subunit beta 4                                      |
